# Supplementary material
Source: publisher site journal article supplement (https://www.dovepress.com/get_supplementary_file.php?f=268872.docx)
Supplement: Supplementary file 1 [file get_supplementary_file.php]

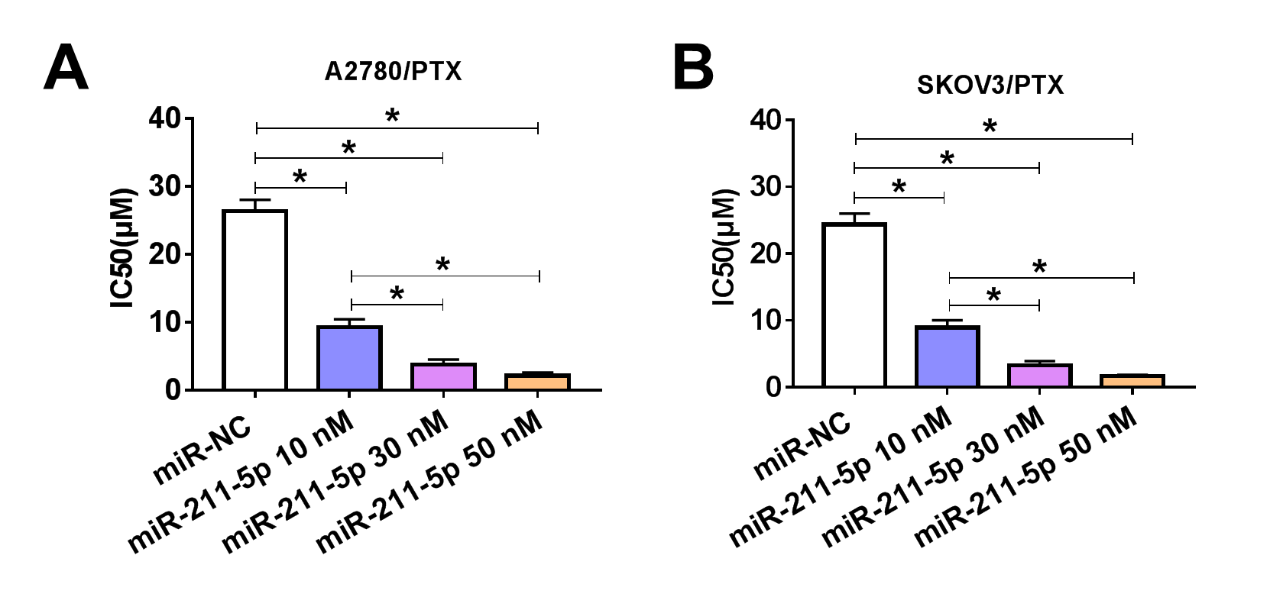


**Supplementary fig. 1 Screening for the concentration of miR-211-5p mimic*.*** A2780/PTX and SKOV3/PTX cells were transfected with miR-NC or different concentrations of miR-211-5p mimic (10, 30 or 50 nM). (A-B) The IC50 values were determined by MTT assay. * *P* < 0.05.


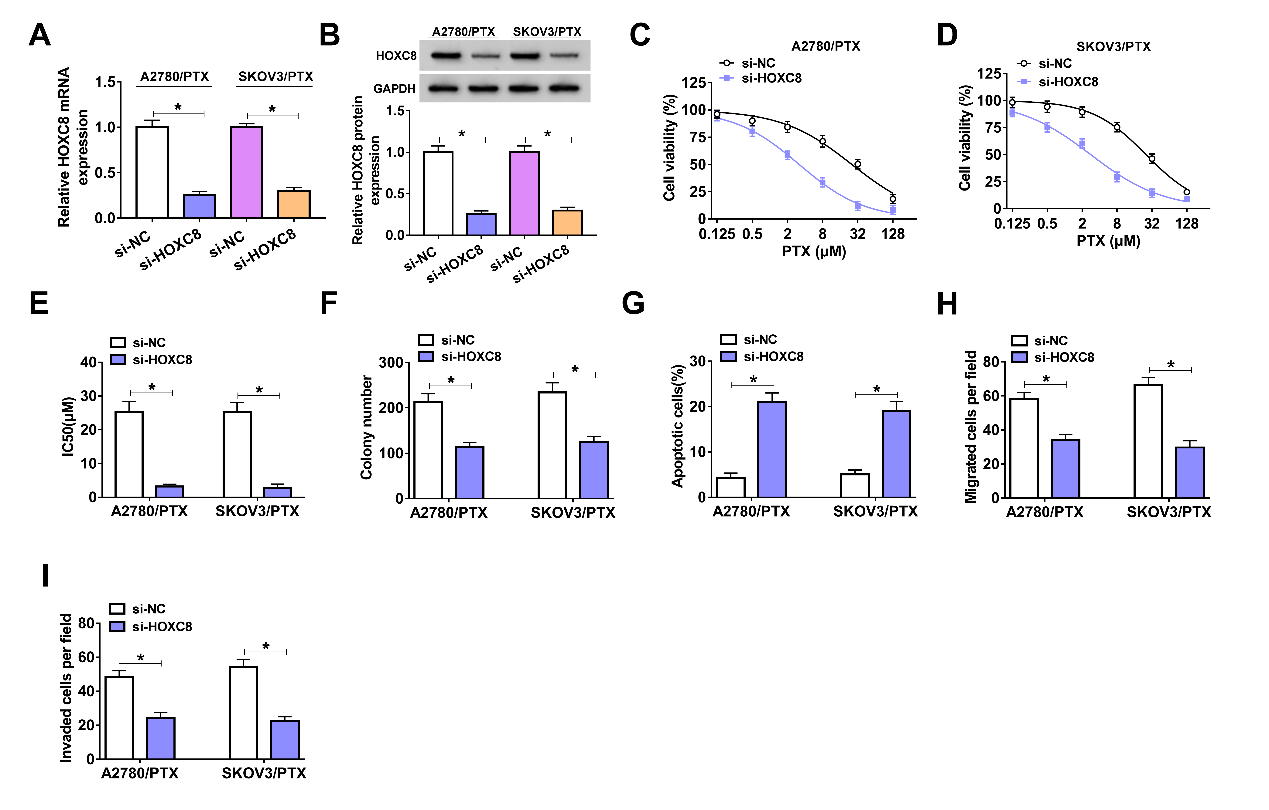


**Supplementary fig. 2 HOXC8 knockdown inhibited the PTX resistance of OC cells*.*** A2780/PTX and SKOV3/PTX cells were transfected with si-NC or si-HOXC8. The mRNA and protein expression levels of HOXC8 were detected by qRT-PCR (A) and WB analysis (B). (C-E) MTT assay was used to examine cell viability and IC50 values. Colony formation assay (F), flow cytometry (G) and transwell assay (H-I) were used to determine the proliferation, apoptosis, migration and invasion of cells, respectively. * *P* < 0.05.
